# Supplementary material for: Carbon-sandwiched perovskite solar cell
Source: Royal Society of Chemistry journal article supplement (doi:10.1039/c7ta09174e), 2017-12-20
Supplement: c7ta09174e1.pdf [file c7ta09174e1.pdf]

## **Electronic Supplementary Information for:**

### **Carbon-Sandwiched Perovskite Solar Cell**

Namyoung Ahn<sup>1†</sup>, Il Jeon<sup>2†</sup>, Jungjin Yoon<sup>1</sup>, Esko I. Kauppinen<sup>3</sup>, Yutaka Matsuo<sup>2\*</sup>, Shigeo Maruyama<sup>2\*</sup>, Mansoo Choi<sup>1\*</sup>

<sup>1</sup>Department of Mechanical and Aerospace Engineering, Seoul National University, Seoul 08826, Korea.

E-mail: mchoi@snu.ac.kr

I. Jeon, Prof. Y. Matsuo, Prof. S. Maruyama

<sup>2</sup>Department of Mechanical Engineering, The University of Tokyo, Tokyo 113- 8656, Japan

E-mail: matsuo@photon.t.u-tokyo.ac.jp, maruyama@photon.t.u-tokyo.ac.jp

E. I. Kauppinen

<sup>3</sup>Department of Applied Physics, Aalto University School of Science, FI-00076 Aalto, Finland

† These authors contributed equally to this work

\* Corresponding authors

E-mail: mchoi@snu.ac.kr, matsuo@photon.t.u-tokyo.ac.jp, maruyama@photon.t.u-tokyo.ac.jp

### **Contents:**

#### **1. Chemical Capacitance Analysis**

#### **2. SEM Analysis**

#### **3. WVTR Measurement**

#### **4. Molecular Computation**

#### **5. Photovoltaic Performance and Hysteresis**

#### **6. Cost Analysis**

## 1. Chemical Capacitance Analysis

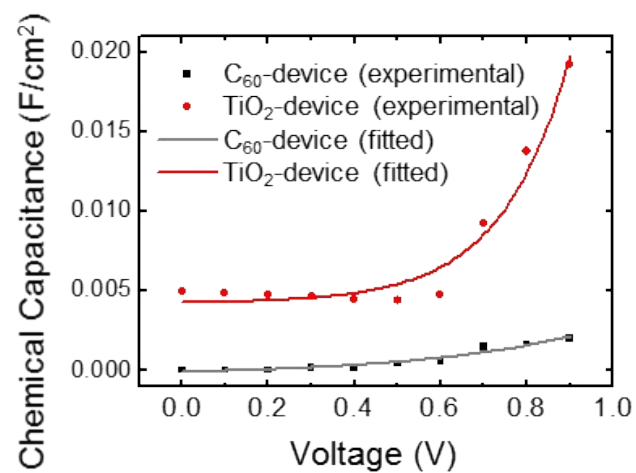

**Figure S1.** Chemical capacitance of C<sub>60</sub> (black) and TiO<sub>2</sub> (red) based device with CNT , respectively.

## 2. SEM Analysis

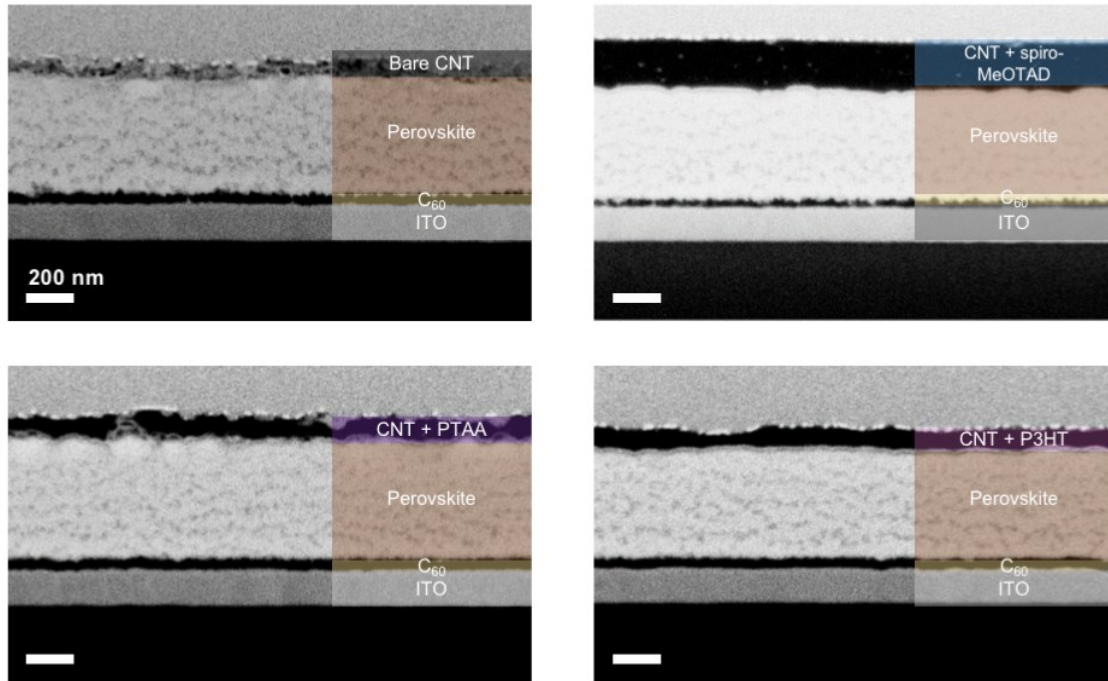

Scale bar: 200 nm

**Figure S2.** Cross-sectional SEM images of the CNT-based devices with different HTMs.

### 3. WVTR Measurement

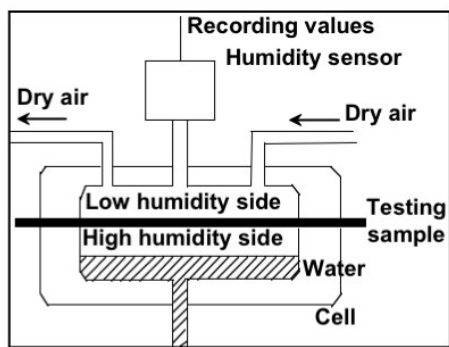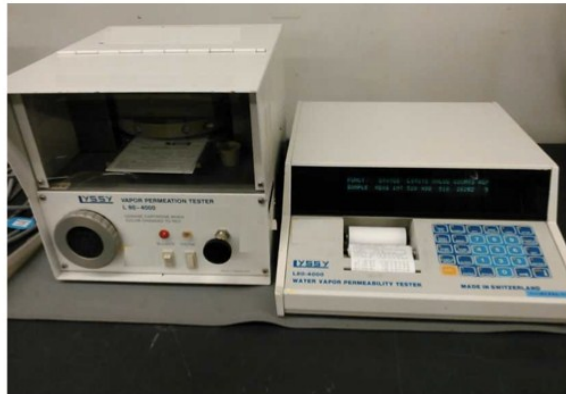

Figure S3. WVTR machine used in this work (right) and its schematic diagram (left).

## 4. Molecular Computation

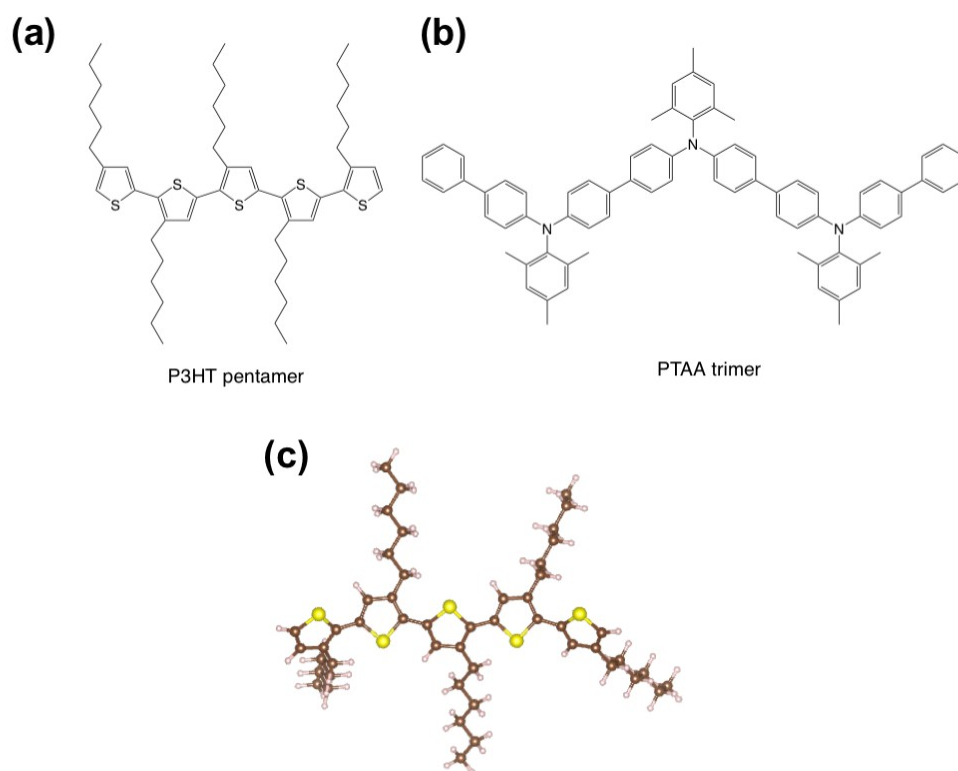

**Figure S4.** Molecular structures of (a) P3HT pentamer and (b) PTAA trimer used in the computational calculation in Figure. 4a, and (c) P3HT molecular configuration before hexyl bond rotation optimization.

## 5. Photovoltaic Performance and Hysteresis

| Electrode type     | Scan direction | $V_{oc}$ (V) | $J_{sc}$ (mA/cm <sup>2</sup> ) | FF   | PCE (%) | Hysteresis Index |
|--------------------|----------------|--------------|--------------------------------|------|---------|------------------|
| CNT + spiro-MeOTAD | Reverse        | 1.08         | 23.8                           | 0.66 | 17.0    | 0.023            |
|                    | Forward        | 1.07         | 23.7                           | 0.66 | 16.6    |                  |
| CNT + PTAA         | Reverse        | 0.98         | 22.9                           | 0.68 | 15.2    | 0.007            |
|                    | Forward        | 0.98         | 23.0                           | 0.68 | 15.3    |                  |
| CNT + P3HT         | Reverse        | 0.88         | 21.4                           | 0.66 | 12.5    | 0.016            |
|                    | Forward        | 0.88         | 21.5                           | 0.65 | 12.3    |                  |
| Bare CNT           | Reverse        | 0.93         | 21.8                           | 0.65 | 13.2    | 0.038            |
|                    | Forward        | 0.92         | 21.8                           | 0.63 | 12.7    |                  |

**Table S1.** Photovoltaic data of the solar cell devices with different cathode types under one sun (AM1.5G illumination, 100 mW cm<sup>-2</sup>) and their hysteresis indices.

## 6. Cost Analysis

| Material                    | Supplier                    | Amount used per device | Price             | Cost (¥)              |
|-----------------------------|-----------------------------|------------------------|-------------------|-----------------------|
| Electron-transporting Layer | TiO <sub>2</sub>            | 6 $\mu$ L              | ¥18,600/L         | 0.1                   |
|                             | Ethanol                     | 42 $\mu$ L             | ¥25,900/L         | 1.1                   |
|                             | mesoporous-TiO <sub>2</sub> | 2.4 mg                 | ¥700/g            | 1.7                   |
|                             | 1-butanol                   | 20 $\mu$ L             | ¥9,000/L          | 0.2                   |
|                             | C <sub>60</sub>             | Sigma-Aldrich          | 0.002 g           | ¥15,000/g             |
| Active Layer                | PbI <sub>2</sub>            | 0.015 g                | ¥2,200/g          | 33.0                  |
|                             | MAI                         | 0.005 g                | ¥3,400/g          | 17.0                  |
|                             | DMSO                        | 2.367 $\mu$ L          | ¥64/g             | 0.0                   |
|                             | DMF                         | 0.019 mL               | ¥5,600/L          | 0.1                   |
|                             | Diethyl ether               | Sigma-Aldrich          | 0.100 mL          | ¥10,380/L             |
| Hole-transporting Layer     | Spiro-MeOTAD                | 1.446 mg               | ¥113,638 /g       | 164.3                 |
|                             | PTAA                        | 0.250 mg               | ¥150,200 /g       | 37.6                  |
|                             | P3HT                        | 0.365 mg               | ¥88,600/g         | 32.3                  |
|                             | CB                          | 0.025 mL               | ¥10,900/L         | 0.3                   |
|                             | TBP                         | 0.576 $\mu$ L          | ¥756/mL           | 0.4                   |
|                             | acetonitrile                | Sigma-Aldrich          | 0.35 $\mu$ L      | ¥5,900/mL             |
| Anode                       | Au                          | 0.06 g                 | ¥24,600/g         | 1,476.0               |
|                             | CNT*                        | Canatu                 | 1 cm <sup>2</sup> | <¥65/9cm <sup>2</sup> |

**Table S2.** Cost analysis of the materials used for the fabrication of lab-scale PSCs in this work. The price corresponds to the fabrication of one substrate (1 cm  $\times$  1 cm) which accommodates four solar devices.

Note: Cathode has not been included as all the devices can adopt either ITO or FTO.  
 High temperature annealing process cost has been excluded to give less leverage to our devices.  
 Vacuum process cost has been excluded for all the devices equally require vacuum once during the process.  
 All the prices have been cited and estimated as of 2016.12.16.  
 \*Canatu cannot disclose the price. However, a spokesperson stated that the price will be lower than that of FTO or ITO substrates in the market.

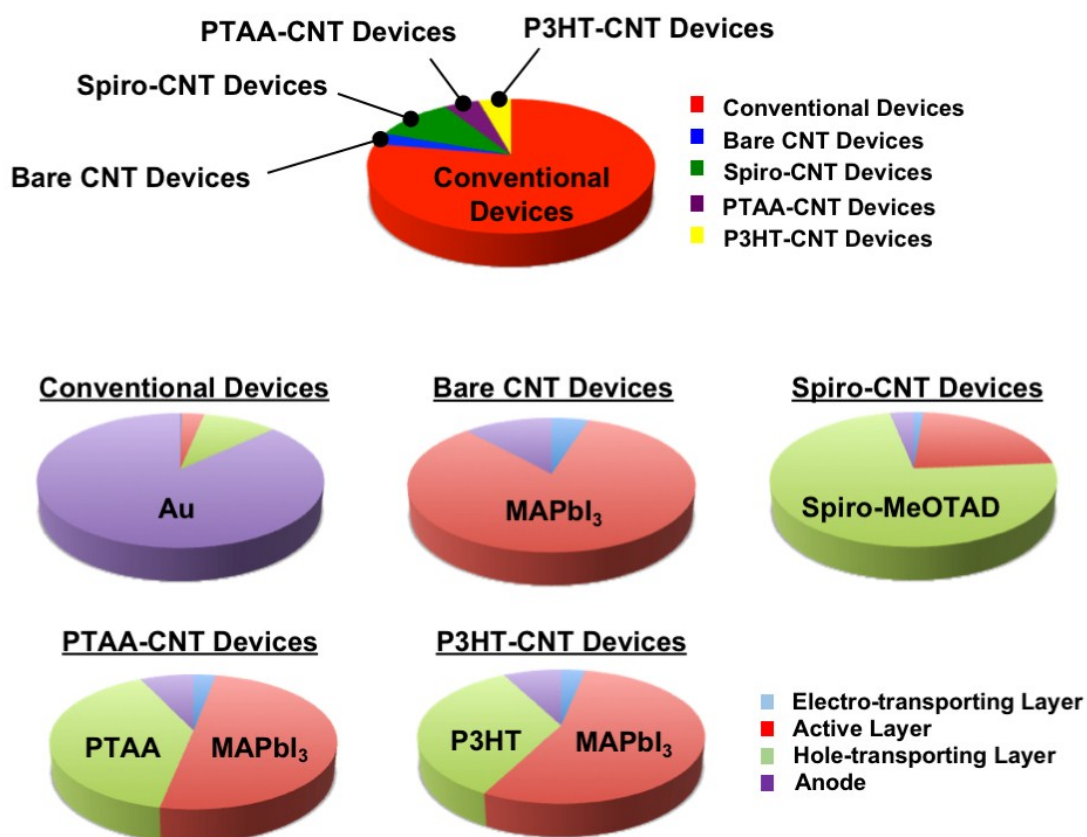

**Figure S5.** Cost analysis pie charts derived from Supplementary Table S2. Comparison of different devices and their price compositions.
